# Supplementary material for: The Genetic Basis of Resilience: A Genome-Wide Association Study Meta-Analysis in the German Population
Source: Research Square preprint supplement (doi:10.21203/rs.3.rs-3170461/v1), 2023-08-25

# The Genetic Basis of Resilience: A Genome-Wide Association Study Meta-Analysis in the German Population

## SUPPLEMENTARY FIGURES

### Suppl.Figure.S1. FUMA-GWAS analysis of variant-based meta-analysis: locus #1.

Suggestive locus localized at chr3:112512647-112518459 (5812 bps). It encompassed 12 variants with at least nominal significance ( $p < 0.05$ ) and implicated six genes by physical proximity and/or eQTL annotation in brain, blood and/or immune cells. The locus was led by the variant rs6797028 ( $p = 9.4 \times 10^{-6}$ ,  $Z = -4.4$ ).

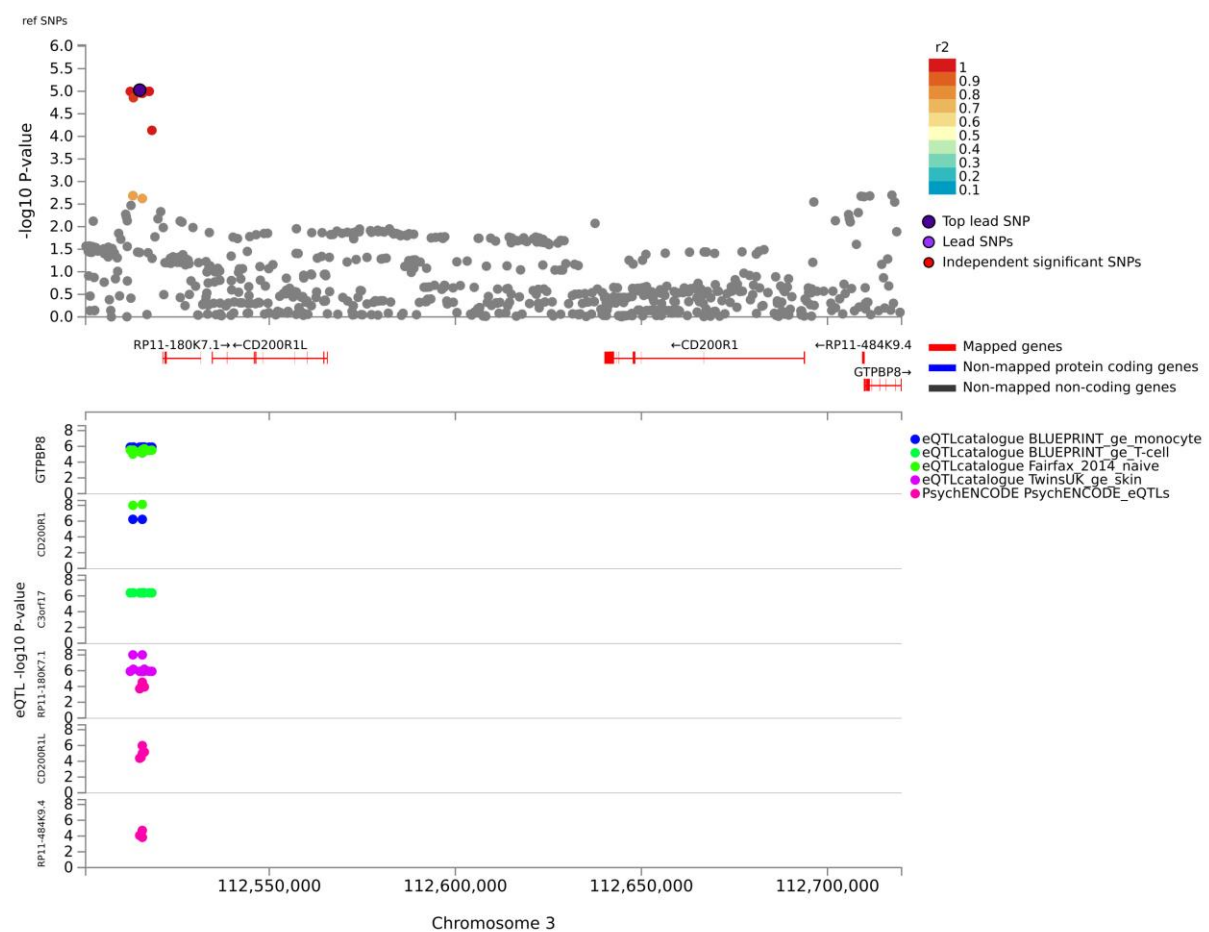

**Suppl.Figure.S2. FUMA-GWAS analysis of variant-based meta-analysis: locus #2.**

Suggestive locus localized at chr3:193598924-193618823 (19899 bps). It encompassed three variants with at least nominal significance ( $p < 0.05$ ). The locus was led by the variant rs78180970 ( $p = 4.9 \times 10^{-6}$ ,  $Z = -4.6$ ).

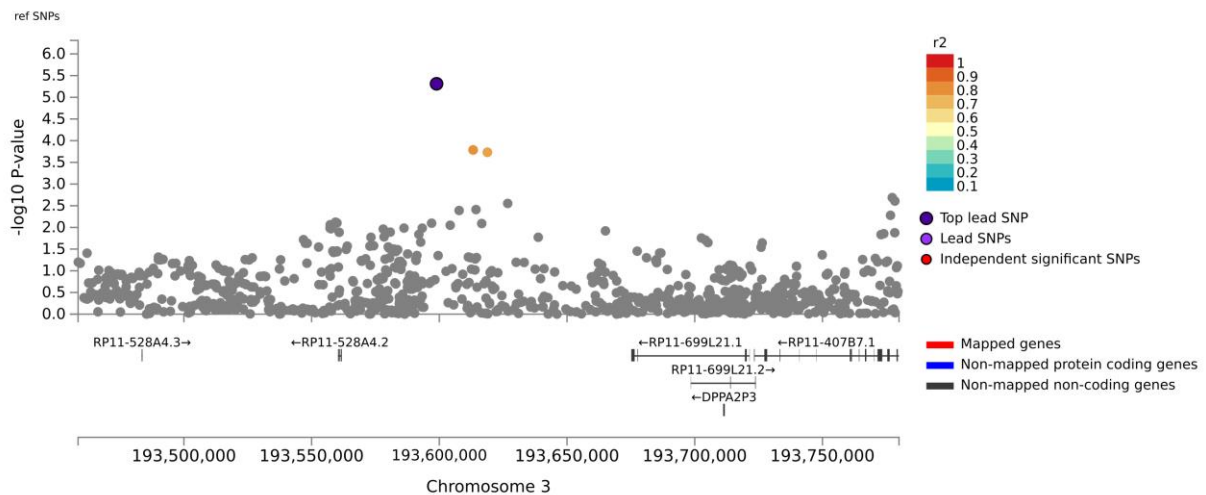**Suppl.Figure.S3. FUMA-GWAS analysis of variant-based meta-analysis: locus #3.**

Suggestive locus localized at chr7:11554555-11561644 (7089 bps). It encompassed four variants with at least nominal significance ( $p < 0.05$ ) and implicated two genes by physical proximity and/or eQTL annotation in brain, blood and/or immune cells. The locus was led by the variant rs17633522 ( $p = 8.1 \times 10^{-6}$ ,  $Z = -4.5$ ).

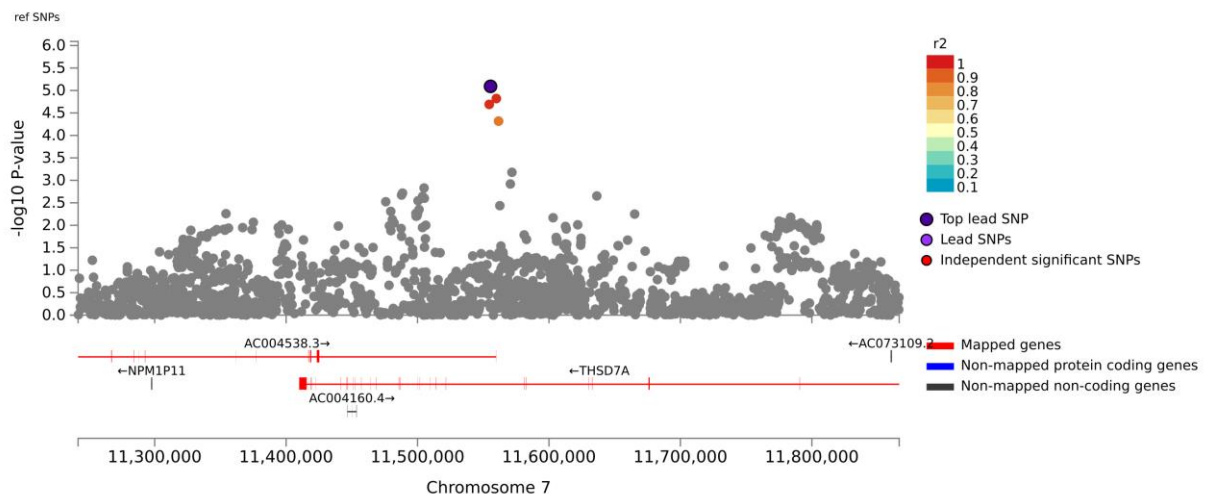

**Suppl.Figure.S4. FUMA-GWAS analysis of variant-based meta-analysis: locus #4.**

Suggestive locus localized at chr14:40763557-40860432 (96875 bps). It encompassed 12 variants with at least nominal significance ( $p < 0.05$ ). The locus was led by the variant rs61989120 ( $p = 3 \times 10^{-6}$ ,  $Z = 4.7$ ).

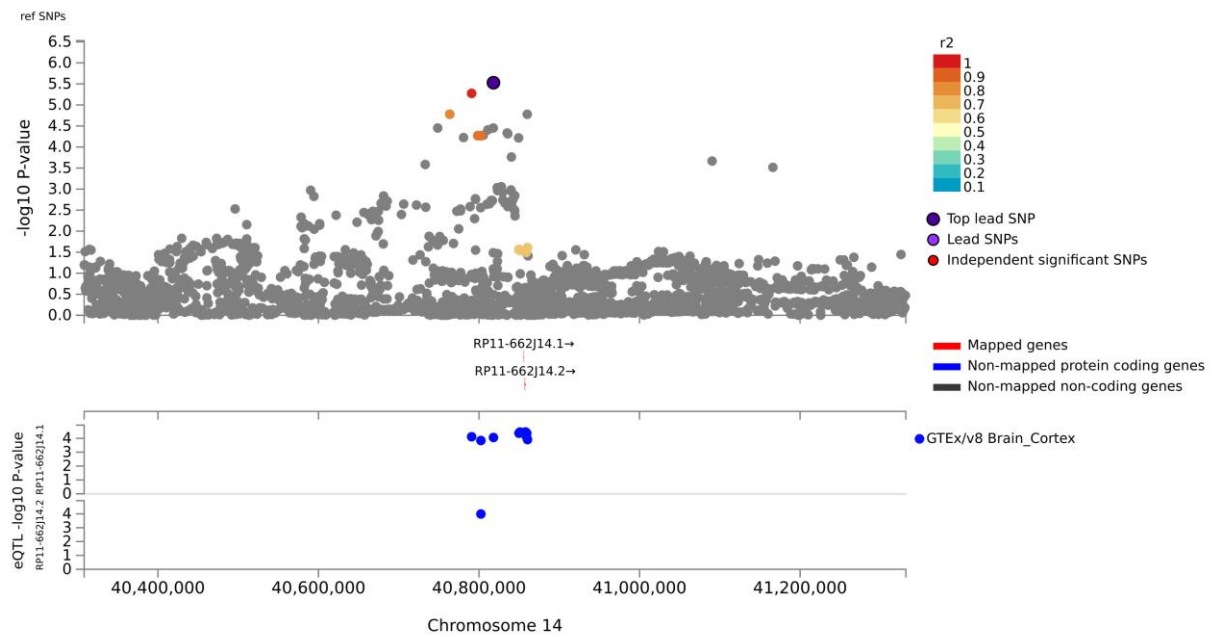

**Suppl.Figure.S5. FUMA-GWAS analysis of variant-based meta-analysis: locus #5.**

Suggestive locus localized at chr17:19612489-19777031 (164542 bps). It encompassed five variants with at least nominal significance ( $p < 0.05$ ) and implicated nine genes by physical proximity and/or eQTL annotation in brain, blood and/or immune cells. The locus was led by the variant rs112155453 ( $p = 3.9 \times 10^{-6}$ ,  $Z = 4.6$ ).

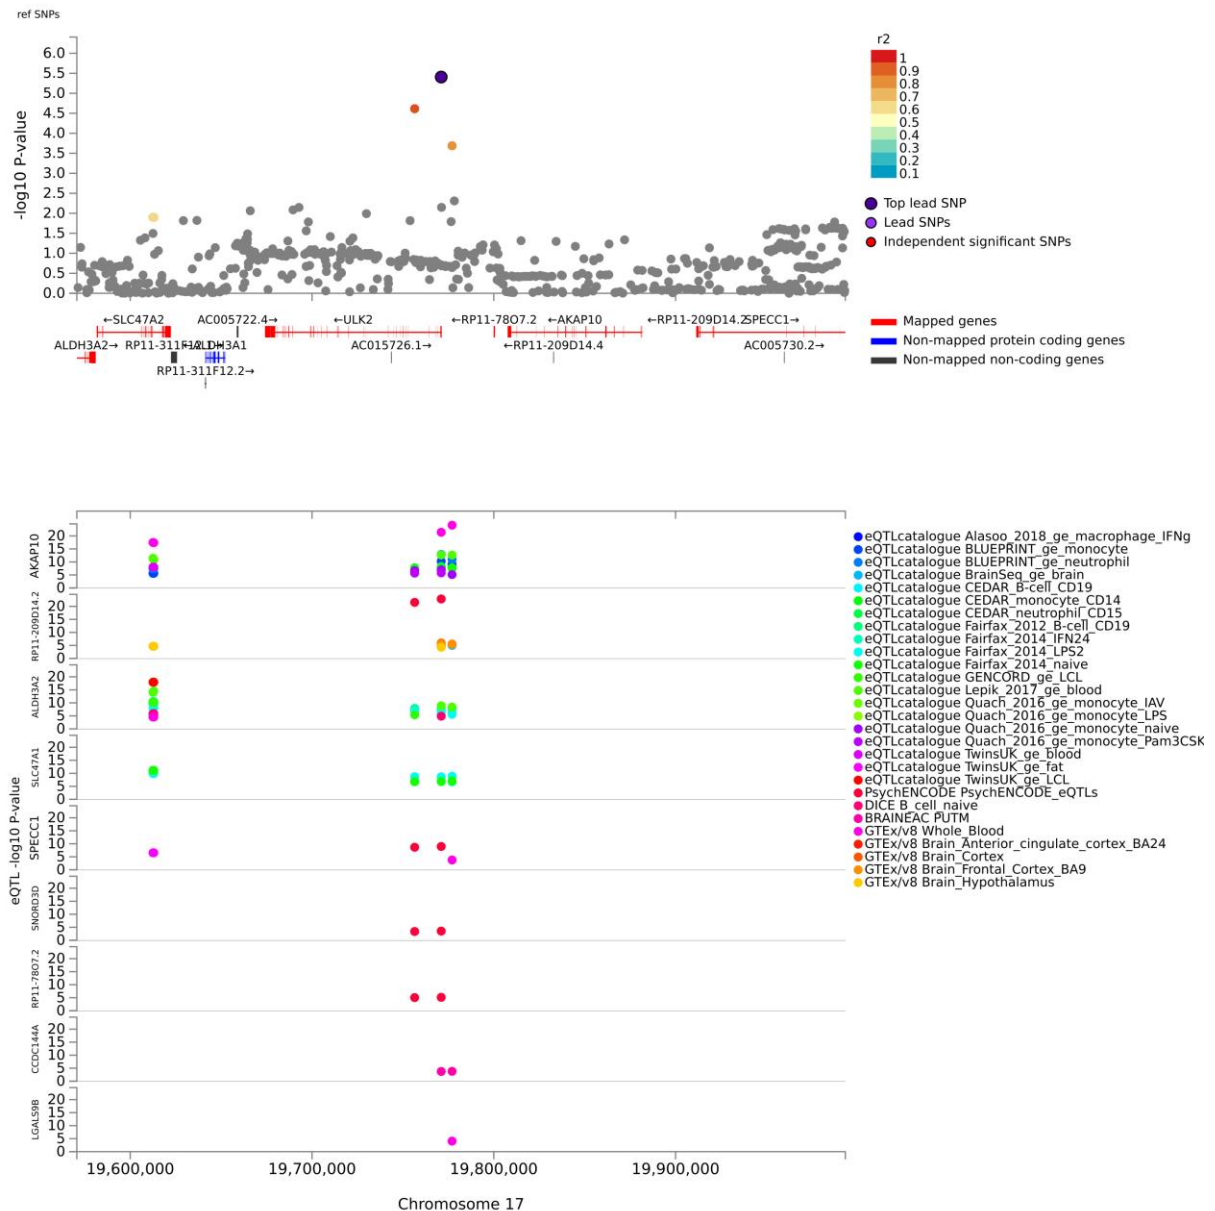

Supplement: Supplementary file 2 [file b616ddaa1159c918e0b647e1.pdf]
